# Supplementary material for: Impact of Agro-Industrial Side-Streams on Sesquiterpene Production by Submerged Cultured Cerrena unicolor
Source: MDPI journal article supplement (doi:10.3390/foods12030668), 2023-02-03
Supplement: s1 [file s1]

**Table S1:** Odor impressions obtained by GC-O measurement of extracts from cultivation of *Cerrena unicolor* in SNL and rapeseed oil as media supplement.

| peak | substance                                                       | odor impression    |
|------|-----------------------------------------------------------------|--------------------|
| 1    | $\alpha$ -Copaene                                               | fresh, honey       |
| 2    | Isosativene                                                     |                    |
| 3    | $\beta$ -Cubebene                                               | citrus, unpleasant |
| 4    | Sesquisabinene                                                  | woody              |
| 5    | Humulene                                                        | woody              |
| 6    | $\alpha$ -Muurolene                                             | woody              |
| 7    | $\beta$ -Curcumene                                              |                    |
| 8    | Cubebol                                                         | spicy              |
| 9    | 5 $\beta$ ,7 $\beta$ H,10 $\alpha$ -Eudesm-11-en-1 $\alpha$ -ol |                    |
| 10   | Cubenol                                                         | heavy, tea         |
| 11   | Epicubenol                                                      |                    |
| 12   | Sesquisabinene hydrate                                          |                    |
| 13   | $\alpha$ -Bisabolol                                             | flowery            |

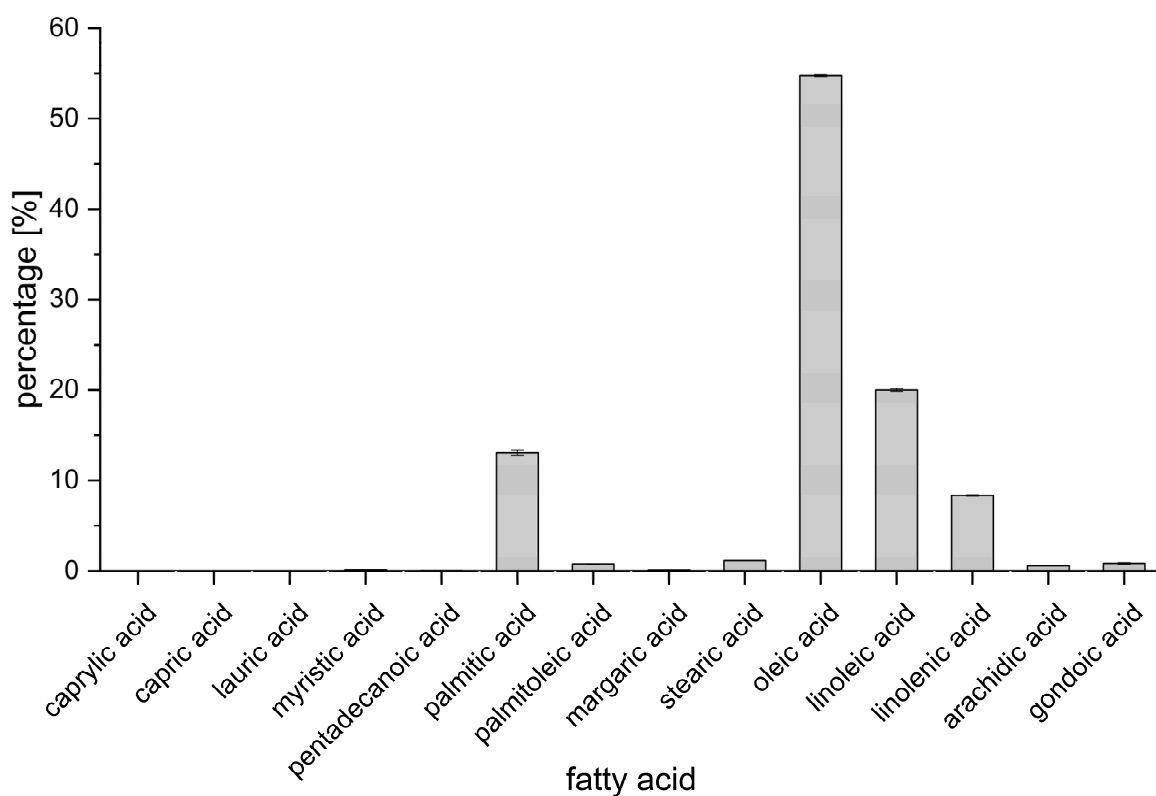

**Figure S1:** Fatty acid distribution of residual oil from rapeseed press cake obtained *via* Soxhlet extraction.

**Table S2:** Intensities of the sesquiterpenoid molecular ion (204 m/z) and isotopic peaks (205 m/z, 206 m/z) in the supernatant after eleven days of cultivation of *Cerrena unicolor* in SNL w/wo supplementation of <sup>13</sup>C sodium acetate.

| m/z | $\alpha$ -Copaene   |                         | Isosativene |                         | $\beta$ -Cubebene                                               |                         |
|-----|---------------------|-------------------------|-------------|-------------------------|-----------------------------------------------------------------|-------------------------|
|     | SNL control         | <sup>13</sup> C-acetate | SNL control | <sup>13</sup> C-acetate | SNL control                                                     | <sup>13</sup> C-acetate |
| 204 | 100                 | 100                     | 100         | 100                     | 100                                                             | 100                     |
| 205 | 16.0                | 29.3                    | 16.8        | 22.5                    | 15.3                                                            | 28.5                    |
| 206 |                     | 4.7                     |             | 3.5                     |                                                                 | 4.6                     |
| m/z | Sesquisabinene      |                         | Humulene    |                         | $\beta$ -Curcumene                                              |                         |
|     | SNL control         | <sup>13</sup> C-acetate | SNL control | <sup>13</sup> C-acetate | SNL control                                                     | <sup>13</sup> C-acetate |
| 204 | 100                 | 100                     | 100         | 100                     | 100                                                             | 100                     |
| 205 | 18.2                | 30.4                    | 39.5        | 46.5                    | 21.8                                                            | 30.9                    |
| 206 |                     | 5.1                     |             | 18.4                    |                                                                 | 6.2                     |
| m/z | $\alpha$ -Muurolene |                         | Cubebol     |                         | 5 $\beta$ ,7 $\beta$ H,10 $\alpha$ -Eudesm-11-en-1 $\alpha$ -ol |                         |
|     | SNL control         | <sup>13</sup> C-acetate | SNL control | <sup>13</sup> C-acetate | SNL control                                                     | <sup>13</sup> C-acetate |
| 204 | 100                 | 100                     | 100         | 100                     | 100                                                             | 100                     |
| 205 | 18.6                | 37.5                    | 20.2        | 29.7                    | 17.0                                                            | 31.9                    |
| 206 |                     | 10.9                    |             | 5.3                     |                                                                 | 6.5                     |
| m/z | Cubanol             |                         | Epicubanol  |                         | Sesquisabinenhydrat                                             |                         |
|     | SNL control         | <sup>13</sup> C-acetate | SNL control | <sup>13</sup> C-acetate | SNL control                                                     | <sup>13</sup> C-acetate |
| 204 | 100                 | 100                     | 100         | 100                     | 100                                                             | 100                     |
| 205 | 28.8                | 46.6                    | 23.1        | 38.6                    | 16.6                                                            | 69.5                    |
| 206 |                     | 8.0                     |             | 6.2                     |                                                                 | 15.9                    |
| m/z | $\alpha$ -Bisabolol |                         |             |                         |                                                                 |                         |
|     | SNL control         | <sup>13</sup> C-acetate |             |                         |                                                                 |                         |
| 204 | 100                 | 100                     |             |                         |                                                                 |                         |
| 205 | 18.4                | 48.8                    |             |                         |                                                                 |                         |
| 206 |                     | 27.5                    |             |                         |                                                                 |                         |
